# Supplementary material for: Motivations for and Challenges in the Development of Global Medical Curricula: A Scoping Review
Source: PubMed Central journal article supplement — Acad Med. 2020 Apr 7;96(3):449–59. doi: 10.1097/ACM.0000000000003383 (PMC7899747; doi:10.1097/acm.0000000000003383), 2020-04-07
Supplement: acm-96-449-s001.pdf [file acm-96-449-s001.pdf]

Supplemental digital content for Giuliani M, Martimianakis MA, Broadhurst M, et al. Motivations for and challenges in the development of global medical curricula: A scoping review. Acad Med.

## Supplemental Digital Appendix 1 Ovid MEDLINE Search Strategy<sup>a</sup>

Ovid MEDLINE 1998 to March 29, 2018

| <b>Medical component including MeSH/<br/>keywords<br/>combined with “OR”</b>                                                                                                                                                                                                                                                                                                                | <b>AND</b> | <b>Curriculum component including<br/>MeSH/keywords<br/>combined with “OR”</b>                                                                                                                                                                                                                                                                                                                                            | <b>AND</b> | <b>Global component including<br/>MeSH/keywords<br/>combined with “OR”</b>                                                                                                                                                                                                                                                                                                  |
|---------------------------------------------------------------------------------------------------------------------------------------------------------------------------------------------------------------------------------------------------------------------------------------------------------------------------------------------------------------------------------------------|------------|---------------------------------------------------------------------------------------------------------------------------------------------------------------------------------------------------------------------------------------------------------------------------------------------------------------------------------------------------------------------------------------------------------------------------|------------|-----------------------------------------------------------------------------------------------------------------------------------------------------------------------------------------------------------------------------------------------------------------------------------------------------------------------------------------------------------------------------|
| <p>Medicine/<br/>exp Physicians/<br/>exp Medical Oncology/<br/>exp Academic Medical Centers/<br/>exp Societies, Medical/<br/>Hospital Medicine/<br/>exp Hospitals, Teaching/<br/>Faculty, Medical/<br/>exp Education, Medical/<br/>Medical Students/<br/>exp "Internship and Residency"/<br/>Clinical Clerkship/oncologist.mp,kw.<br/>(academ* adj2 (medicine? or<br/>medical?)).mp,kw.</p> |            | <p>exp Curriculum/<br/>Educational Measurement/<br/>Models, Educational/<br/>Program Development/<br/>Program Evaluation/<br/>Training Support/<br/>curricul*.mp,kw.<br/>(educat* adj2 measur*).mp,kw.<br/>(educat* adj2 model*).mp,kw.<br/>(program* adj2 develop*).mp,kw.<br/>(program* adj2 evaluat*).mp,kw.<br/>(train* adj2 program*).mp,kw.<br/>(requir* adj2 program*).mp,kw.<br/>(core? adj2 program*).mp,kw.</p> |            | <p>Global Health/<br/>exp Internationality/<br/>exp International Cooperation/<br/>International Agencies/<br/>international*.mp,kw.<br/>global*.tw,kw.<br/>intercontinental*.tw,kw.<br/>inter-continental*.tw,kw.<br/>universal*.tw,kw.<br/>multinational*.tw,kw.<br/>multi-national*.tw,kw.<br/>world wide*.tw,kw.<br/>worldwide*.tw,kw.<br/>"without border?".mp,kw.</p> |

Supplemental digital content for Giuliani M, Martimianakis MA, Broadhurst M, et al. Motivations for and challenges in the development of global medical curricula: A scoping review. Acad Med.

((medical or surgical) adj2 societ\*).mp,kw.  
(hospital? adj2 (medicine? or teaching)).mp,kw.  
(facult\* adj2 (medicine? or medical?)).mp,kw.  
(educat\* adj2 (medicine? or medical?)).mp,kw.  
(student? adj2 (medicine? or medical?)).mp,kw.  
(graduat\* adj2 (medicine? or  
medical?)).mp,kw.  
(postgraduat\* adj2 (medicine? or  
medical?)).mp,kw.  
residen\*.tw,kw.  
internship\*.mp,kw.  
intern?.mp,kw.  
fellowship\*.mp,kw.  
fellow?.mp,kw.  
clerkship\*.mp,kw.  
preclerkship\*.mp,kw.

(learn\* adj2 program\*).mp,kw.  
(teach\* adj2 program\*).mp,kw.  
(standard\* adj2 program\*).mp,kw.  
(core? adj2 subject?).mp,kw.  
(requir\* adj2 subject?).mp,kw.  
(standard\* adj2 subject?).mp,kw.  
(core? adj2 course?).mp,kw.  
(requir\* adj2 course?).mp,kw.  
(standard\* adj2 course?).mp,kw.  
pedagog\*.mp,kw.  
outline?.tw,kw.  
syllab\*.tw,kw.  
module?.tw,kw.

imperiali?m.mp,kw.  
coloniali?m.mp,kw.  
anti-colonial\*.mp,kw.  
anticolonial\*.mp,kw.  
neocolonial\*.mp,kw.  
neo-colonial\*.mp,kw.  
postcolonial\*.mp,kw.  
post-colonial\*.mp,kw

<sup>a</sup>This search was conducted in the following databases: MEDLINE Epub Ahead of Print, In-Process, and Other Non-Indexed Citations; Embase; Cochrane Central Register of Controlled Trials; Cochrane Database of Systematic Reviews; PsycInfo; CINAHL; ERIC; Scopus; African Index Medicus; and LILACS (results in Spanish).
